# Supplementary material
Source: MDPI journal article supplement (https://www.mdpi.com/2076-3298/10/12/207)
Supplement: s1 [file s1]

## Supplementary material

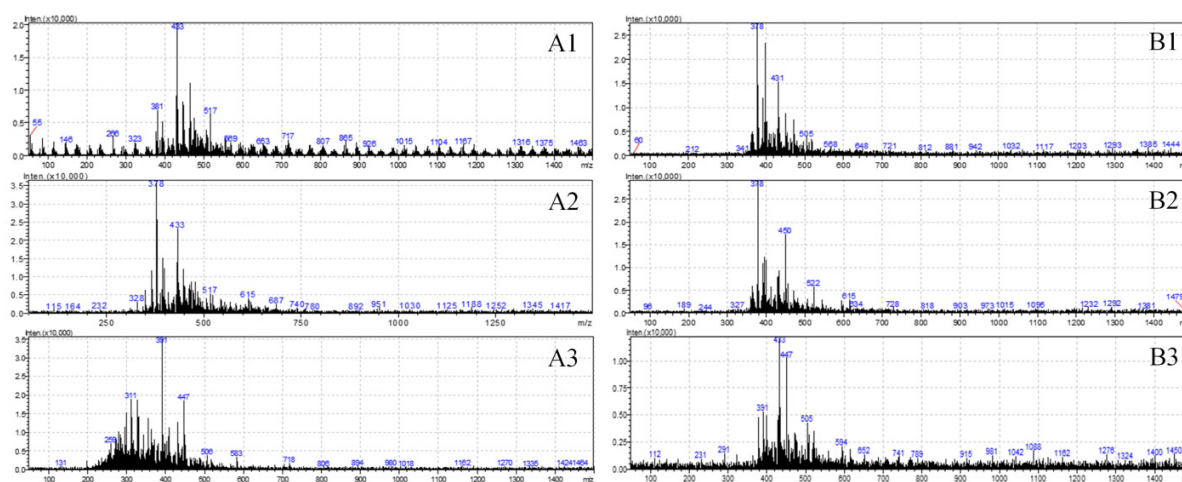

**Figure S1.** The MS spectra of the aqueous phase in contact with MPs for biodegradation experiments with *Delftia acidovorans* (A) and *Candida parapsilosis* (B). The following cases are shown: the aqueous phase at the beginning of the biodegradation experiments (A1 and B1), the aqueous phase after 30 days of exposure to PS (A2 and B2), and the aqueous phase after 30 days of exposure to PVC (A3 and B3).

**Table S1.** Experimental design to determine the optimal conditions for the biodegradation of PS and PVC MPs by bacterium and yeast selected as the best in preliminary experiments. The design included the pH value of the medium, agitation speed (*AS*), and cell density (*OD*).

| Selected bacterium |    |                 |           | Selected yeast |    |                 |           |
|--------------------|----|-----------------|-----------|----------------|----|-----------------|-----------|
| Exp. no.           | pH | <i>AS</i> / rpm | <i>OD</i> | Exp. no.       | pH | <i>AS</i> / rpm | <i>OD</i> |
| 1-1                | 6  | 120             | 1.0       | 2-1            | 3  | 120             | 1.0       |
| 1-2                | 6  | 120             | 0.5       | 2-2            | 3  | 120             | 0.5       |
| 1-3                | 6  | 120             | 0.1       | 2-3            | 3  | 120             | 0.1       |
| 1-4                | 7  | 120             | 1.0       | 2-4            | 5  | 120             | 1.0       |
| 1-5                | 7  | 120             | 0.5       | 2-5            | 5  | 120             | 0.5       |
| 1-6                | 7  | 120             | 0.1       | 2-6            | 5  | 120             | 0.1       |
| 1-7                | 8  | 120             | 1.0       | 2-7            | 7  | 120             | 1.0       |
| 1-8                | 8  | 120             | 0.5       | 2-8            | 7  | 120             | 0.5       |
| 1-9                | 8  | 120             | 0.1       | 2-9            | 7  | 120             | 0.1       |
| 1-10               | 6  | 160             | 1.0       | 2-10           | 3  | 160             | 1.0       |
| 1-11               | 6  | 160             | 0.5       | 2-11           | 3  | 160             | 0.5       |
| 1-12               | 6  | 160             | 0.1       | 2-12           | 3  | 160             | 0.1       |
| 1-13               | 7  | 160             | 1.0       | 2-13           | 5  | 160             | 1.0       |
| 1-14               | 7  | 160             | 0.5       | 2-14           | 5  | 160             | 0.5       |
| 1-15               | 7  | 160             | 0.1       | 2-15           | 5  | 160             | 0.1       |
| 1-16               | 8  | 160             | 1.0       | 2-16           | 7  | 160             | 1.0       |
| 1-17               | 8  | 160             | 0.5       | 2-17           | 7  | 160             | 0.5       |
| 1-18               | 8  | 160             | 0.1       | 2-18           | 7  | 160             | 0.1       |
| 1-19               | 6  | 200             | 1.0       | 2-19           | 3  | 200             | 1.0       |
| 1-20               | 6  | 200             | 0.5       | 2-20           | 3  | 200             | 0.5       |
| 1-21               | 6  | 200             | 0.1       | 2-21           | 3  | 200             | 0.1       |
| 1-22               | 7  | 200             | 1.0       | 2-22           | 5  | 200             | 1.0       |
| 1-23               | 7  | 200             | 0.5       | 2-23           | 5  | 200             | 0.5       |
| 1-24               | 7  | 200             | 0.1       | 2-24           | 5  | 200             | 0.1       |
| 1-25               | 8  | 200             | 1.0       | 2-25           | 7  | 200             | 1.0       |
| 1-26               | 8  | 200             | 0.5       | 2-26           | 7  | 200             | 0.5       |
| 1-27               | 8  | 200             | 0.1       | 2-27           | 7  | 200             | 0.1       |

**Table S2.** The suitability of four regression models (Eqs. (1)–(4)) to fit the experimental data of log CFU for the biodegradation of PS and PVC MPs by *Delftia acidovorans* and *Candida parapsilosis*. The influence of three factors: medium pH, agitation speed (AS) and cell density (OD) was considered.

| Microorganism               | MP  | Model | Equation                                                                                                                                                                                                                                                                                                                         | $R^2$  | $R^2_{adj}$ | $F$   | $p^*$    |
|-----------------------------|-----|-------|----------------------------------------------------------------------------------------------------------------------------------------------------------------------------------------------------------------------------------------------------------------------------------------------------------------------------------|--------|-------------|-------|----------|
| <i>Delftia acidovorans</i>  | PS  | I     | $\log CFU = 7.67 + 6.11 \cdot 10^{-3} \cdot pH - 3.11 \cdot 10^{-3} \cdot AS + 5.37 \cdot 10^{-1} \cdot OD$                                                                                                                                                                                                                      | 0.5983 | 0.5459      | 11.42 | < 0.0001 |
|                             |     | II    | $\log CFU = 2.71 + 7.42 \cdot 10^{-1} \cdot pH + 3.21 \cdot 10^{-2} \cdot AS - 1.11 \cdot OD - 5.21 \cdot 10^{-3} \cdot pH \cdot AS + 1.83 \cdot 10^{-1} \cdot pH \cdot OD + 2.32 \cdot 10^{-3} \cdot AS \cdot OD$                                                                                                               | 0.8777 | 0.8410      | 23.92 | < 0.0001 |
|                             |     | III   | $\log CFU = 10.78 - 8.11 \cdot 10^{-1} \cdot pH - 7.78 \cdot 10^{-3} \cdot AS + 9.49 \cdot 10^{-1} \cdot OD + 5.83 \cdot 10^{-2} \cdot pH^2 + 1.46 \cdot 10^{-5} \cdot AS^2 - 3.69 \cdot 10^{-1} \cdot OD^2$                                                                                                                     | 0.6235 | 0.5106      | 5.52  | 0.0016   |
|                             |     | IV    | $\log CFU = 5.83 - 7.48 \cdot 10^{-2} \cdot pH + 2.74 \cdot 10^{-2} \cdot AS - 7.03 \cdot 10^{-1} \cdot OD - 5.21 \cdot 10^{-3} \cdot pH \cdot AS + 1.83 \cdot 10^{-1} \cdot pH \cdot OD + 2.32 \cdot 10^{-3} \cdot AS \cdot OD + 5.83 \cdot 10^{-2} \cdot pH^2 + 1.46 \cdot 10^{-5} \cdot AS^2 - 3.69 \cdot 10^{-1} \cdot OD^2$ | 0.9029 | 0.8514      | 17.56 | < 0.0001 |
|                             | PVC | I     | $\log CFU = 8.39 - 3.86 \cdot 10^{-2} \cdot pH - 1.57 \cdot AS + 3.15 \cdot 10^{-1} \cdot OD$                                                                                                                                                                                                                                    | 0.6923 | 0.6522      | 17.25 | < 0.0001 |
|                             |     | II    | $\log CFU = 7.61 + 2.39 \cdot 10^{-2} \cdot pH + 5.41 \cdot AS + 3.45 \cdot 10^{-1} \cdot OD - 6.87 \cdot pH \cdot AS + 8.89 \cdot 10^{-2} \cdot pH \cdot OD - 4.08 \cdot AS \cdot OD$                                                                                                                                           | 0.8320 | 0.7816      | 16.50 | < 0.0001 |
|                             |     | III   | $\log CFU = 7.90 + 4.32 \cdot 10^{-1} \cdot pH - 1.68 \cdot 10^{-2} \cdot AS + 5.43 \cdot 10^{-1} \cdot OD - 3.36 \cdot 10^{-2} \cdot pH^2 + 4.75 \cdot AS^2 - 2.04 \cdot 10^{-1} \cdot OD^2$                                                                                                                                    | 0.7694 | 0.7002      | 11.12 | < 0.0001 |
|                             |     | IV    | $\log CFU = 7.12 + 4.95 \cdot 10^{-1} \cdot pH - 9.80 \cdot AS + 5.73 \cdot 10^{-1} \cdot OD - 6.87 \cdot pH \cdot AS + 8.89 \cdot 10^{-2} \cdot pH \cdot OD - 4.08 \cdot AS \cdot OD - 3.36 \cdot 10^{-2} \cdot pH^2 + 4.75 \cdot AS^2 - 2.04 \cdot 10^{-1} \cdot OD^2$                                                         | 0.9090 | 0.8609      | 18.88 | < 0.0001 |
| <i>Candida parapsilosis</i> | PS  | I     | $\log CFU = 5.63 + 1.96 \cdot 10^{-1} \cdot pH - 2.45 \cdot AS + 2.30 \cdot 10^{-1} \cdot OD$                                                                                                                                                                                                                                    | 0.6959 | 0.6562      | 17.54 | < 0.0001 |
|                             |     | II    | $\log CFU = 5.60 + 2.37 \cdot 10^{-1} \cdot pH - 3.37 \cdot AS - 1.49 \cdot 10^{-2} \cdot OD - 2.03 \cdot pH \cdot AS - 1.74 \cdot 10^{-2} \cdot pH \cdot OD + 2.08 \cdot AS \cdot OD$                                                                                                                                           | 0.7013 | 0.6117      | 7.83  | 0.0002   |
|                             |     | III   | $\log CFU = 1.59 + 1.22 \cdot pH + 2.30 \cdot 10^{-2} \cdot AS - 1.72 \cdot 10^{-2} \cdot OD - 1.03 \cdot 10^{-1} \cdot pH^2 - 7.25 \cdot AS^2 + 2.22 \cdot 10^{-1} \cdot OD^2$                                                                                                                                                  | 0.9568 | 0.9438      | 73.76 | < 0.0001 |
|                             |     | IV    | $\log CFU = 1.56 + 1.27 \cdot pH + 2.29 \cdot 10^{-2} \cdot AS - 2.63 \cdot 10^{-1} \cdot OD - 2.03 \cdot pH \cdot AS - 1.74 \cdot 10^{-2} \cdot pH \cdot OD + 2.08 \cdot AS \cdot OD - 1.03 \cdot 10^{-1} \cdot pH^2 - 7.25 \cdot AS^2 + 2.22 \cdot 10^{-1} \cdot OD^2$                                                         | 0.9622 | 0.9422      | 48.05 | < 0.0001 |
|                             | PVC | I     | $\log CFU = 6.95 - 5.28 \cdot pH - 2.69 \cdot AS + 1.09 \cdot OD$                                                                                                                                                                                                                                                                | 0.8602 | 0.8420      | 47.19 | < 0.0001 |
|                             |     | II    | $\log CFU = 6.65 + 1.36 \cdot 10^{-2} \cdot pH - 1.30 \cdot AS + 1.63 \cdot OD - 2.08 \cdot pH \cdot AS - 2.92 \cdot 10^{-2} \cdot pH \cdot OD - 2.41 \cdot AS \cdot OD$                                                                                                                                                         | 0.8661 | 0.8259      | 21.55 | < 0.0001 |
|                             |     | III   | $\log CFU = 4.44 + 4.41 \cdot 10^{-1} \cdot pH + 1.53 \cdot 10^{-2} \cdot AS + 1.94 \cdot OD - 4.46 \cdot 10^{-2} \cdot pH^2 - 5.63 \cdot AS^2 - 7.60 \cdot 10^{-1} \cdot OD^2$                                                                                                                                                  | 0.9310 | 0.9103      | 44.96 | < 0.0001 |
|                             |     | IV    | $\log CFU = 4.14 + 4.59 \cdot 10^{-1} \cdot pH + 1.67 \cdot 10^{-2} \cdot AS + 2.47 \cdot OD - 2.08 \cdot pH \cdot AS - 2.92 \cdot 10^{-2} \cdot pH \cdot OD - 2.41 \cdot AS \cdot OD - 4.46 \cdot 10^{-2} \cdot pH^2 - 5.63 \cdot AS^2 - 7.60 \cdot 10^{-1} \cdot OD^2$                                                         | 0.9368 | 0.9034      | 28.00 | < 0.0001 |

\*  $p < 0.05$  (significance)
